# Supplementary material
Source: PubMed Central journal article supplement (PMC4962792)
Supplement: ci6b00222_si_001.pdf [file ci6b00222_si_001.pdf]

# SUPPORTING INFORMATION

## Local Protein Structure Refinement via Molecular Dynamics Simulations with locPREFMD

*Michael Feig*<sup>1,2\*</sup>

<sup>1</sup>Department of Biochemistry and Molecular Biology and

<sup>2</sup>Department of Chemistry, Michigan State University,

East Lansing, Michigan 48824, United States

\*Email: feig@msu.edu

### **Contents:**

Tables S1-S3

Figures S1, S2

Modified CMAP parameters.

**Table S1:** Bond force field terms that were modified from the standard CHARMM36 force field. Modified values (equilibrium bond distance and/or force constant) are given in bold with the original force field values given in parentheses. CHARMM atom types are given in parentheses below the atom names.

| Residue(s)                                                                                  | Atoms          | Minimum [ $\text{\AA}$ ] | Force constant<br>[kcal/mol/ $\text{\AA}^2$ ] |
|---------------------------------------------------------------------------------------------|----------------|--------------------------|-----------------------------------------------|
| PRO                                                                                         | N-C<br>(N-C)   | 1.329 (1.30)             | 560.0 (260.0)                                 |
| ALA/ARG/ASN/ASP/CYS/<br>GLN/GLU/GLY/HSD/HSE/<br>HSP/ILE/LYS/MET/PHE/<br>SER/THR/TRP/TYR/VAL | N-C<br>(NHI-C) | 1.329 (1.345)            | 570.0 (370.0)                                 |

**Table S2:** Angle force field terms that were modified from the standard CHARMM36 force field. Modified values (equilibrium angle and/or force constant) are given in bold with the original force field values given in parentheses. CHARMM atom types are given in parentheses below the atom names.

| Residue(s)                                                                              | Atoms                            | Minimum [degrees] | Force constant [kcal/mol/degrees <sup>2</sup> ] |
|-----------------------------------------------------------------------------------------|----------------------------------|-------------------|-------------------------------------------------|
| PHE/TYR                                                                                 | CA-CB-CG<br>(CT1-CT2-CA)         | 110.5 (107.5)     | 151.8 (51.8)                                    |
| ASN/GLN                                                                                 | CA-CB-CG<br>(CT1-CT2-CC)         | 110.0 (108.0)     | 152.0 (52.0)                                    |
| HSD/HSE/HSP                                                                             | CA-CB-CG<br>(CT1-CT2-CPH1)       | 113.0             | 158.35 (58.35)                                  |
| ALA/ARG/ASN/ASP/CYS/<br>GLN/GLU/HSD/HSE/HSP/<br>ILE/LYS/MET/PHE/SER/<br>THR/TRP/TYR/VAL | N-C-CA<br>(NH1-C-CT1)            | 116.5             | 180.0 (80.0)                                    |
| ARG/ASN/CYS/GLN/HSD/<br>HSE/HSP/LYS/MET/PHE/<br>SER/TRP/TYR                             | N-CA-CB<br>(NH1-CT1-CT2)         | 110.5 (113.5)     | 170.0 (70.0)                                    |
| HSD                                                                                     | NR2-CPH1-CPH1<br>(NR1-CPH1-CPH1) | 106.0             | 230.0 (130.0)                                   |
| HSE                                                                                     | ND1-CG-CD2<br>(NR2-CPH1-CPH1)    | 108.0 (110.0)     | 230.0 (130.0)                                   |
| HSD/HSE/HSP                                                                             | NE2-CE1-ND1<br>(NR2-CPH2-NR1)    | 110.5 (112.5)     | 230.0 (130.0)                                   |

|         |                                  |                      |                     |
|---------|----------------------------------|----------------------|---------------------|
| ASP/GLU | N-CA-CB<br><i>(NH1-CT1-CT2A)</i> | 110.5 <i>(113.5)</i> | 170.0 <i>(70.0)</i> |
| ASP     | CA-CB-CG<br><i>(CT1-CT2A-CC)</i> | 110.0 <i>(108.0)</i> | 152.0 <i>(52.0)</i> |

**Table S3:** Additional improper torsion terms to maintain sidechain ring planarity.

| Residue(s)      | Atoms         | Minimum | Force constant<br>[kcal/mol/degrees <sup>2</sup> ] |
|-----------------|---------------|---------|----------------------------------------------------|
| HIS/HSD/HSE/HSP | CG-CD2-ND1-CB | 0       | 30.0                                               |
| PHE/TYR         | CG-CD1-CD2-CB | 0       | 30.0                                               |

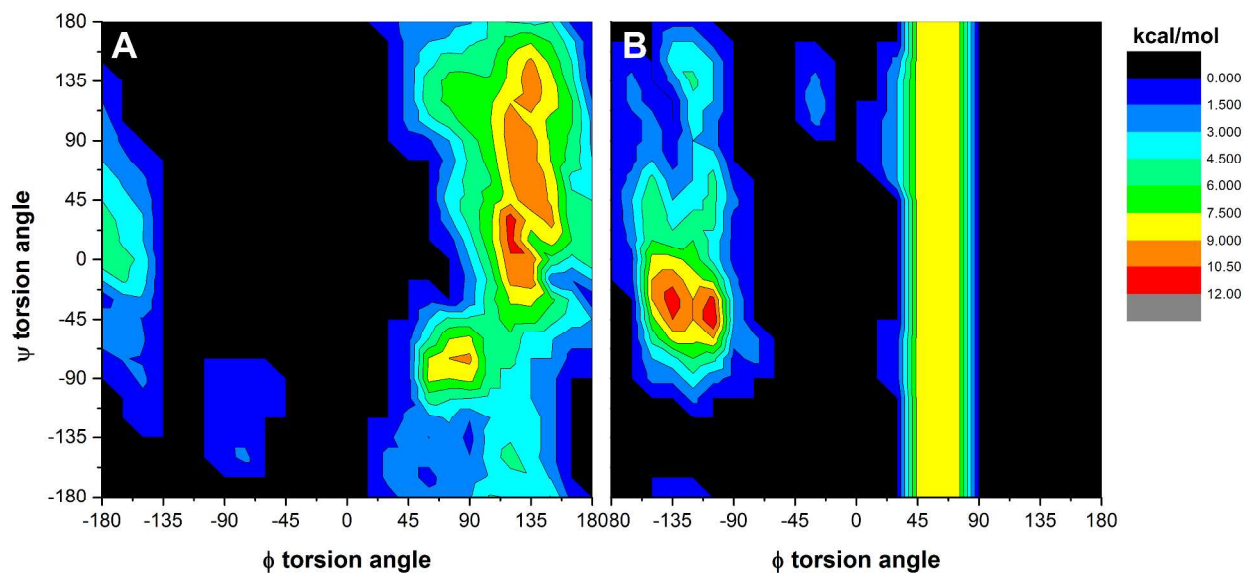

**Figure S1:** Difference between the CMAP used here as a function of  $\phi$  and  $\psi$  backbone torsion angles (in degrees) compared to the standard CHARMM force field for non-proline/non-glycine residues (A; left) and proline residues (B; right).

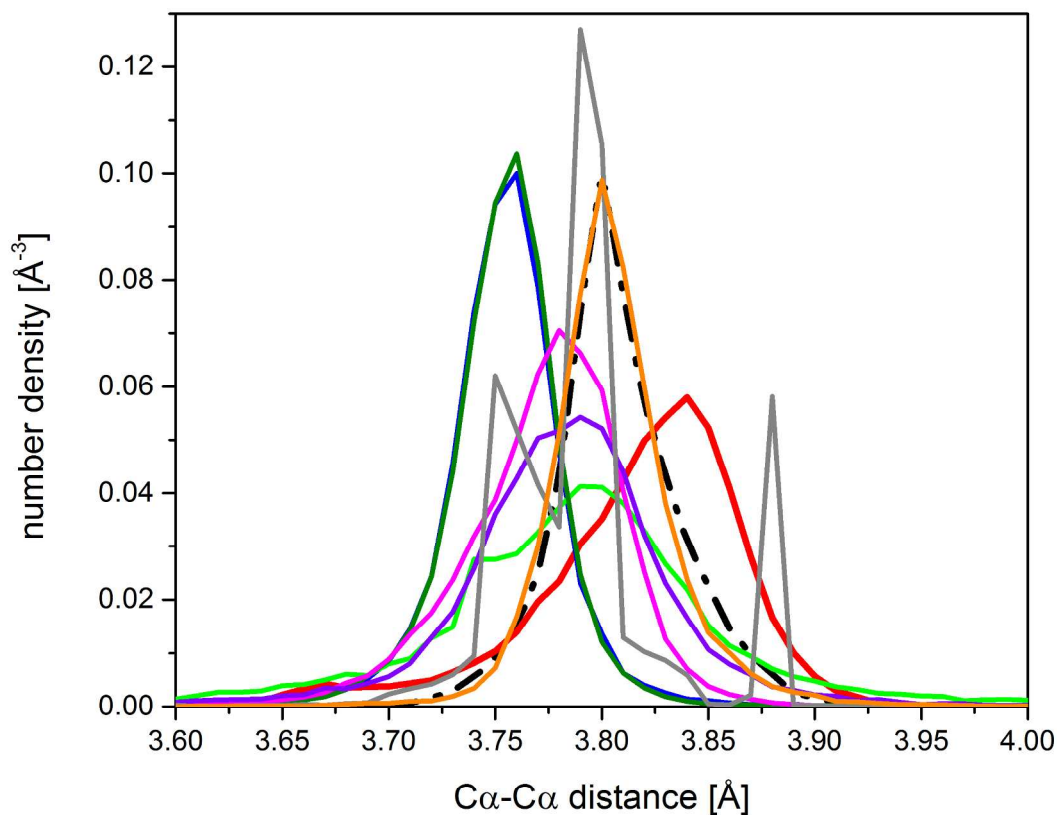

**Figure S2:** Radial distribution of  $C\alpha$ - $C\alpha$  distances in subsequent residues normalized by spherical shell volumes as a function of distance for CASP11 server targets. The distribution from the native PDB structures (black dashed line) is compared with model 1 (TS1) server predictions from Zhang-Server (red), Rosetta (orange), TASSER-VMT (grey), RaptorX (violet), HHPredX (green), MULTICOM-CONSTRUCT (dark green), FFAS-3D (blue), and nns (magenta).

Modified CMAP entry to be used in CHARMM parameter file (also available upon request from the author):

```

CMAP
! alanine map
C   NH1  CT1  C   NH1  CT1  C   NH1  24
! phi = -180.0
  0.126790  0.768700  0.971260  1.250970  2.121010
  2.720430  2.089440  2.789790  2.780870  2.288474
  1.501130  0.900520  0.827670  0.821447  0.913223
  0.891106  0.766446  0.204200  0.204589  0.246991
 -0.835350 -1.222656 -0.951542 -0.036650

! phi = -165.0
 -0.127133  1.377090  1.577020  1.872290  2.398990
  2.486630  3.236754  3.529070  3.886456  3.543400
  2.558676  2.000440  1.009477  0.135306  0.420090
  0.602140  0.599128  0.501241  0.101780 -0.861434
 -0.640168 -0.207701 -1.076344 -1.122030

! phi = -150.0
  0.084069  1.420317  1.624350  2.047200  2.853910
  3.816410  4.221416  3.285454  3.257466  3.863293
  2.525720  1.815886  1.583256  0.006154  0.551995
  0.890683  0.554215  0.027243  0.068512 -0.225016
 -0.765479 -1.283444 -1.293226 -0.816303

! phi = -135.0
  0.927992  1.521370  2.242218  2.546305  3.111384
  2.918410  2.460813  2.187970  2.058314  1.852278
  0.115935 -1.183897 -1.995479 -2.278329 -1.959136
 -1.340467 -0.932949  0.021790  0.313725 -0.517358
 -1.152891 -0.983285 -0.566518 -0.442565

! phi = -120.0
  1.357468  1.959160  2.698894  3.037857  3.698960
  3.558453  2.639296  2.773853  2.719664  1.627997
  0.705667 -0.785637 -2.118268 -2.628489 -1.803113
 -0.425969 -0.062320  0.439040  0.910952 -0.546994
 -0.968118 -0.856791 -0.250116  0.449309

! phi = -105.0
  2.045006  2.544424  2.818030  3.088582  3.370620
  3.551568  3.073520  2.903794  2.956634  2.124759
  0.906487 -0.823628 -2.090819 -2.241579 -1.456524
  0.206160  0.082195  0.771710  1.040241 -0.124647
 -0.316550 -0.164333  0.314474  0.733747

! phi = -90.0
  1.451735  2.748481  3.638185  4.156796  4.450028
  4.344157  3.780200  3.898724  3.335030  2.440579
  0.912671 -0.606502 -1.511772 -1.620864 -0.962798
 -0.020653  0.415153  0.908250  0.459433  0.145910
 -0.071054  0.017622  0.280839  0.748823

! phi = -75.0
  1.378160  3.345958  4.352424  4.063543  4.814070
  4.700796  4.980310  4.212293  3.536425  1.693809
  0.095172 -0.682452 -0.123614 -0.427765 -0.598368
  0.226352  0.423308  0.301999  0.551890  0.191719

```



|               |           |           |           |           |           |
|---------------|-----------|-----------|-----------|-----------|-----------|
|               | -0.253585 | -0.190548 | -0.253412 | 0.468922  |           |
| ! phi = -60.0 |           |           |           |           |           |
|               | 0.237754  | 1.229980  | 1.716960  | 3.168570  | 4.208190  |
|               | 5.391860  | 5.276080  | 3.673107  | 2.272295  | -0.482789 |
|               | -0.406695 | -0.038919 | -0.357600 | -0.823341 | -0.173146 |
|               | 0.139806  | 0.267796  | 0.322420  | 0.309664  | -0.666399 |
|               | -0.948631 | -1.534365 | -1.479968 | -0.204264 |           |
| ! phi = -45.0 |           |           |           |           |           |
|               | -1.184837 | 0.078060  | 2.347410  | 4.211350  | 5.376000  |
|               | 5.389940  | 4.380200  | 2.461506  | 1.123713  | 0.107016  |
|               | 0.007574  | -0.149443 | -0.797230 | -0.582210 | 0.082910  |
|               | 0.271580  | -0.045570 | 0.379430  | 0.247770  | -0.890956 |
|               | -1.582430 | -1.954532 | -1.980965 | -2.000433 |           |
| ! phi = -30.0 |           |           |           |           |           |
|               | -1.174720 | 1.067030  | 4.180460  | 6.741610  | 6.070770  |
|               | 4.806470  | 2.783340  | 1.320806  | 0.765978  | -0.008448 |
|               | 0.276860  | -0.707140 | 1.314360  | 1.522590  | 1.915550  |
|               | 2.223490  | 0.194290  | 0.534000  | 0.331780  | -1.595147 |
|               | -2.849141 | -3.550465 | -3.277369 | -2.655135 |           |
| ! phi = -15.0 |           |           |           |           |           |
|               | 0.293590  | 5.588070  | 3.732620  | 3.217620  | 3.272450  |
|               | 2.517320  | 1.588700  | 1.381760  | 0.856410  | 0.655170  |
|               | 1.616970  | 0.846920  | 0.511070  | 0.740760  | 1.021020  |
|               | 1.616580  | -0.342400 | 0.181770  | -0.613920 | -2.558037 |
|               | -3.786839 | -3.807325 | -3.155346 | -1.749204 |           |
| ! phi = 0.0   |           |           |           |           |           |
|               | 2.832310  | 0.787990  | 0.323280  | 0.479230  | 0.628600  |
|               | 0.976330  | 1.238750  | 1.671950  | 1.645480  | 2.520340  |
|               | 1.606970  | 0.776350  | 0.119780  | 0.070390  | 0.121170  |
|               | -1.569230 | -1.213010 | -1.846360 | -2.744510 | -3.792530 |
|               | -3.934880 | -3.615930 | -2.675750 | -0.924170 |           |
| ! phi = 15.0  |           |           |           |           |           |
|               | -0.778340 | -1.912680 | -2.052140 | -1.846280 | -1.047430 |
|               | 0.183400  | 1.682950  | 2.223500  | 1.358370  | 2.448660  |
|               | 1.436920  | 0.678570  | -0.237060 | -0.535320 | -0.790380 |
|               | -2.182580 | -3.251140 | -4.195110 | -4.269270 | -3.908210 |
|               | -3.455620 | -2.773970 | 1.755370  | 0.313410  |           |
| ! phi = 30.0  |           |           |           |           |           |
|               | -2.163810 | -1.483730 | -1.441809 | -1.400349 | -1.125083 |
|               | 0.336200  | 1.428450  | 1.394630  | 0.970370  | 2.462720  |
|               | 1.522430  | 0.553620  | -0.407380 | -1.482950 | -3.613920 |
|               | -4.159810 | -4.709721 | -4.496271 | -3.764540 | -2.959140 |
|               | -1.963850 | -1.071260 | -1.599580 | -2.445320 |           |
| ! phi = 45.0  |           |           |           |           |           |
|               | -1.821496 | -1.836549 | -1.365327 | 0.534377  | 0.984725  |
|               | 1.362000  | 1.814380  | 1.754110  | 1.502370  | 1.903420  |
|               | 0.770220  | -0.416420 | -3.286310 | -3.875270 | -4.611550 |
|               | -5.287977 | -5.146239 | -4.038627 | -1.865450 | -0.368170 |
|               | -0.860490 | -1.416560 | -1.666490 | -1.595217 |           |
| ! phi = 60.0  |           |           |           |           |           |
|               | -1.353683 | -1.984416 | -0.317412 | 0.240143  | 2.257890  |
|               | 5.922610  | 8.668070  | 8.038130  | 6.895330  | 4.632470  |
|               | -1.041450 | -3.218100 | -3.915080 | -4.568574 | -5.096776 |
|               | -5.526955 | -5.005312 | -3.777879 | -1.540678 | 0.508820  |

|               |           |           |           |           |
|---------------|-----------|-----------|-----------|-----------|
| 1.756430      | 1.640810  | 0.451845  | -0.342810 |           |
| ! phi = 75.0  |           |           |           |           |
| 0.248733      | 0.641080  | 1.010583  | 2.539656  | 3.836063  |
| 5.423710      | 8.017140  | 9.013120  | 7.070910  | 3.692809  |
| -2.305650     | -3.420580 | -4.484960 | -4.807237 | -3.001264 |
| -1.787739     | -1.740525 | -1.619378 | -0.685150 | 1.151360  |
| 2.170739      | 2.725589  | 1.736732  | 0.620673  |           |
| ! phi = 90.0  |           |           |           |           |
| 1.120840      | 1.177830  | 1.128430  | 1.277730  | 2.407900  |
| 5.303260      | 8.582510  | 9.036900  | 7.086270  | 3.074070  |
| -0.593220     | -1.828560 | -2.211800 | -2.294328 | -1.617221 |
| -0.763953     | 0.272995  | 0.911450  | 1.158306  | 2.473413  |
| 2.099325      | 2.769822  | 2.157300  | 1.651694  |           |
| ! phi = 105.0 |           |           |           |           |
| 2.850640      | 2.092420  | 3.445020  | 3.828490  | 4.005520  |
| 4.884820      | 5.485850  | 4.818470  | 4.257670  | 3.682330  |
| 2.514400      | 0.481110  | 0.053510  | 0.165400  | 0.171130  |
| 0.728240      | 1.912230  | 1.802110  | 2.034640  | 2.715990  |
| 2.600554      | 2.086721  | 2.274630  | 2.410940  |           |
| ! phi = 120.0 |           |           |           |           |
| 2.469230      | 2.916650  | 4.540250  | 4.150330  | 4.763520  |
| 5.038890      | 4.758480  | 5.313530  | 5.333050  | 4.872770  |
| 4.366270      | 4.508260  | 4.124810  | 4.034830  | 4.724320  |
| 4.700200      | 4.510620  | 4.185650  | 4.361620  | 4.847490  |
| 4.444320      | 4.004260  | 4.415720  | 3.751230  |           |
| ! phi = 135.0 |           |           |           |           |
| 2.111250      | 3.168960  | 3.322790  | 4.006920  | 4.316660  |
| 4.086270      | 3.939170  | 3.625340  | 3.166360  | 4.830310  |
| 4.469470      | 4.946030  | 4.112560  | 4.915580  | 4.047310  |
| 4.996740      | 4.996730  | 4.842690  | 4.886620  | 4.300540  |
| 5.094620      | 5.442210  | 5.163570  | 4.183510  |           |
| ! phi = 150.0 |           |           |           |           |
| 2.757590      | 2.403620  | 2.023920  | 2.362390  | 2.634520  |
| 3.264920      | 3.361360  | 3.948420  | 3.073680  | 3.483560  |
| 3.152820      | 3.835120  | 3.762860  | 3.093660  | 3.744830  |
| 3.390070      | 3.783930  | 3.190630  | 3.115420  | 3.042280  |
| 4.125570      | 4.028550  | 3.026100  | 2.937910  |           |
| ! phi = 165.0 |           |           |           |           |
| 0.210590      | -0.071500 | 0.378890  | 0.543310  | 1.277880  |
| 1.641310      | 1.698840  | 2.519950  | 2.631950  | 2.588670  |
| 1.436530      | 0.835240  | -0.563830 | -0.408350 | -0.889450 |
| -0.141750     | -0.194970 | 1.666490  | 1.843450  | 2.555000  |
| 2.548722      | 1.746995  | 1.751289  | 1.814368  |           |

```

!proline map
C   N   CP1  C   N   CP1   C   NH1 24
! phi = -180.0
  2.973500  3.348200  3.062900  2.113400  1.040500
  0.770600  0.785200  0.263300 -0.479000 -0.583000
 -0.463800 -0.292600  0.000000  0.259100  0.177100
 -0.151200 -0.173500  0.211700  0.348900 -0.135600
 -0.950000 -1.256600 -0.292800  1.560000

! phi = -165.0
  5.674100  6.011400  5.562700  4.467300  3.390800
  3.008800  2.848600  2.311200  1.661400  1.468400
  1.142700  2.437400  3.113200  4.799500  5.589100
  5.869000  5.016100  4.328500  4.232900  3.547600
  3.647200  3.422700  3.517100  4.339800

! phi = -150.0
  6.752800  6.973200  6.444300  5.389800  4.438600
  4.046000  5.832800  6.442400  8.303500 10.010000
 11.838100 12.162200 11.778300 10.362800 10.603600
 10.546200  9.702100  7.837200  6.549500  5.849600
  4.099200  3.031800  4.060200  5.624800

! phi = -135.0
  8.627800  8.153400  7.342500  5.893500  4.799200
  4.433400  6.551500  8.442800 10.222200 11.276300
 12.190000 12.152300 11.932900 10.274900  9.830800
  8.988600  7.588500  6.211000  5.918000  4.292100
  3.495500  5.449800  8.617700  9.311700

! phi = -120.0
  9.115600  8.477200  7.754300  6.585000  5.537900
  6.964300  8.929000 10.421200 10.336100 10.257800
 10.769300 11.359900 12.018000 12.055500 11.217600
  9.726100  8.512200  8.820200  8.716700  8.872300
  8.066800  9.094600  9.284900  9.931500

! phi = -105.0
  9.249700  9.483000  8.668500  7.525300  7.003200
  6.834600  8.822100 10.287600 12.320600 14.640300
 14.464800 12.100300 10.537600 10.885600 10.842000
 10.248700 10.540200 10.652400  9.196700  8.625400
  8.710100  8.581700  9.651500  9.192800

! phi = -90.0
  9.335600  9.208000  8.564600  8.010200  7.885100
  8.212200  9.737100  9.429100  9.306500  9.474200
  9.651300  9.484700  9.195300  9.295000  8.407200
  8.529900  7.242000  6.227500  6.347300  6.449700
  6.404700  6.579300  7.391700  8.570700

! phi = -75.0
 10.955200 11.455400 11.173300 10.428700 10.062400
 10.044500  9.279600  8.965100  7.361500  5.102700
  6.267600  7.871600  8.009800  7.104500  6.616400
  6.733700  7.504000  8.664700  9.282800  8.795900
  7.872500  7.612400  8.498100  9.894000

```

```

! phi = -60.0
  8.422900  8.529200  8.608500  9.306400 10.239400
 11.025900 11.510800  9.283500  7.566000  6.624600
   7.038700  8.222400  8.786400  8.512000  8.103500
   7.988200  8.192900  8.291000  8.055600  7.436800
   6.651800  6.317000  6.802500  7.746300

! phi = -45.0
   6.913200  7.937400  8.610800  9.316600  9.388500
   9.408400  8.828800  7.297900  5.456400  4.742700
   5.793100  7.118800  7.565400  7.598500  7.438700
   7.512500  7.878100  8.082200  7.642700  6.320500
   4.680400  3.830500  4.215800  5.435200

! phi = -30.0
   5.466700  7.116000  8.908800  8.347200  7.413500
   7.047000  6.031600  4.193100  2.674800  3.023700
   4.485300  5.451700  6.214900  6.422600  6.229300
   6.191100  6.488900  6.646400  5.833400  5.751300
   4.719800  3.064900  2.955800  3.860800

! phi = -15.0
   3.061500  5.603800 12.179500  6.295200  5.323400
   4.826500  3.705600  2.461500  2.291600  3.145900
   3.562100  4.443600  5.337500  5.728800  5.694800
   5.641600  5.943300  6.169000  4.759500  2.569400
   1.357100  1.669800  3.212300  5.031900

! phi = 0.0
   8.085900  8.051100  5.023600  3.450800  2.836100
   2.192500  1.566200  1.456300  2.039300  1.945200
   2.188400  2.921300  3.467500  3.543500  3.374500
   3.472300  4.069900  3.615600  2.082200  0.958600
   0.792600  1.494200  2.794900  4.853100

! phi = 15.0
   6.639500  5.177400  3.252300  1.952700  1.078400
   0.888300  1.505400  2.442300  2.178600  1.578600
   1.777400  2.395400  2.820200  2.795200  2.662400
   2.917100  2.562100  2.557900  2.322300  2.631400
   2.051200  2.555600  3.039100  4.915000

! phi = 30.0
   7.548800  5.095500  2.747000  0.955200  0.444500
   1.318700  3.733300  4.223200  3.565500  2.150900
   2.394400  2.939300  3.266000  3.210000  3.113400
   2.491300  3.978300  3.815300  4.522700  5.055600
   5.199900  5.327600  5.474200  7.977800

! phi = 45.0
   8.000000  8.000000  8.000000  8.000000  8.000000
   8.000000  8.000000  8.000000  8.000000  8.000000
   8.000000  8.000000  8.000000  8.000000  8.000000
   8.000000  8.000000  8.000000  8.000000  8.000000
   8.000000  8.000000  8.000000  8.000000

! phi = 60.0
   8.000000  8.000000  8.000000  8.000000  8.000000
   8.000000  8.000000  8.000000  8.000000  8.000000
   8.000000  8.000000  8.000000  8.000000  8.000000
   8.000000  8.000000  8.000000  8.000000

```
